# Supplementary material
Source: MDPI journal article supplement (https://www.mdpi.com/2227-9040/8/4/122)
Supplement: s1 [file s1]

Supporting Information

# Pyridinyl Conjugate of UiO-66-NH<sub>2</sub> as Chemosensor for the Sequential Detection of Iron and Pyrophosphate Ion in Aqueous Media

Aasif Helal <sup>1,\*</sup>, Md. Eyasin Arafat <sup>1</sup> and Mohammad Mizanur Rahman <sup>2</sup>

<sup>1</sup> Center of Research Excellence in Nanotechnology, King Fahd University of Petroleum and Minerals, Dhahran 31261, Saudi Arabia; g201707550@kfupm.edu.sa

<sup>2</sup> Center of Research Excellence in Corrosion, King Fahd University of Petroleum & Minerals, Dhahran 31261, Saudi Arabia; mrahman@kfupm.edu.sa

\* Correspondence: aasifh@kfupm.edu.sa; Tel.: +966-013-860-7532

Received: 7 October 2020; Accepted: 23 November 2020; Published: date

## 1. Characterization of H<sub>2</sub>L

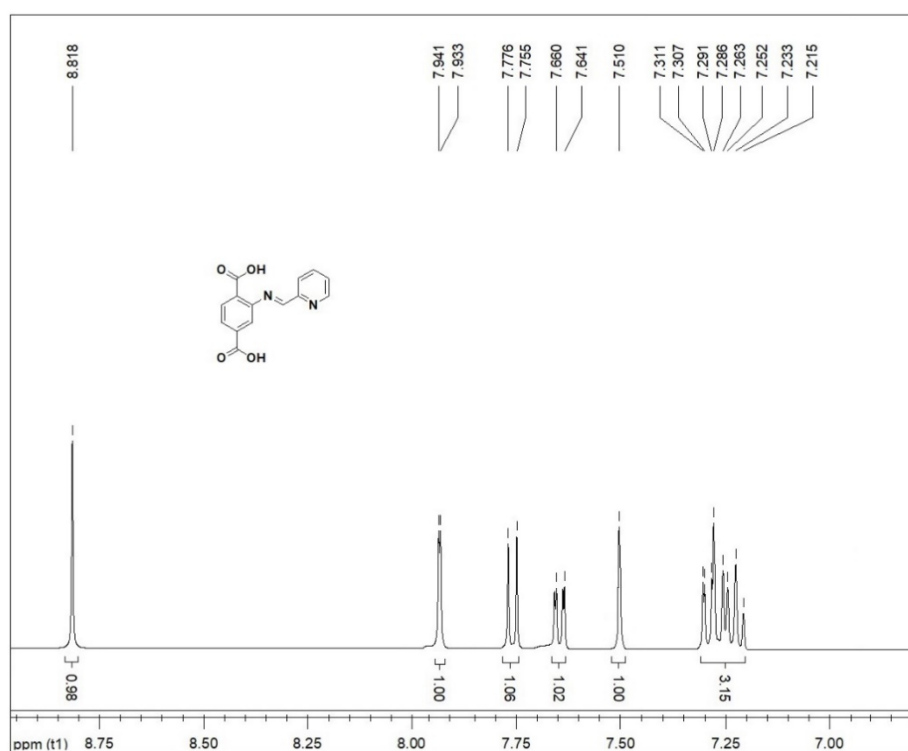

Figure S1. <sup>1</sup>H NMR spectrum of H<sub>2</sub>L in DMSO-*d*<sub>6</sub> solution at 400 MHz.

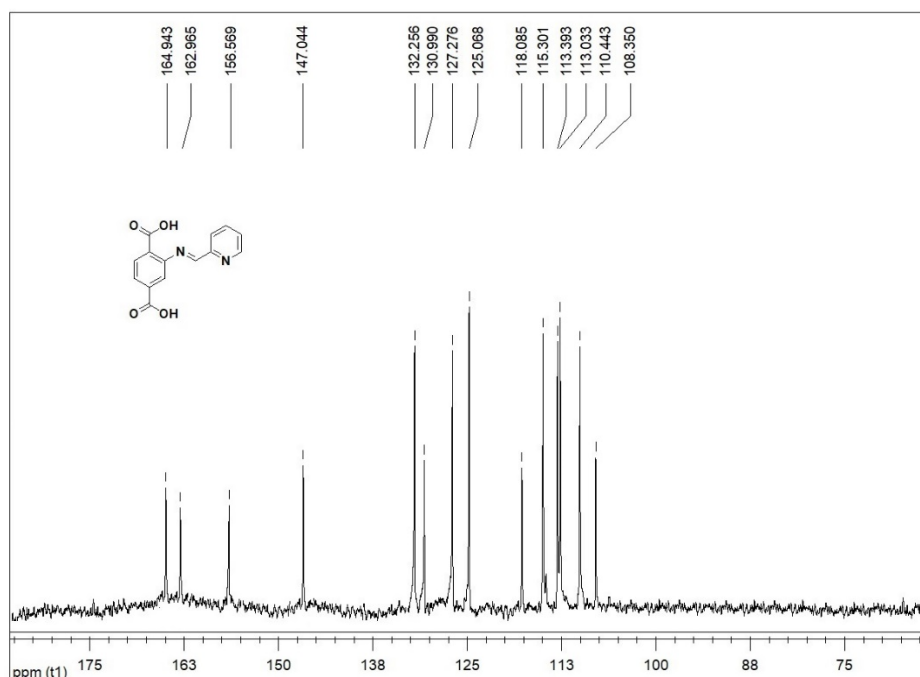

Figure S2.  $^{13}\text{C}$  NMR spectrum of  $\text{H}_2\text{L}$  in  $\text{DMSO}-d_6$  solution at 400 MHz.

## 2. Characterization of UiO-66-N-Py

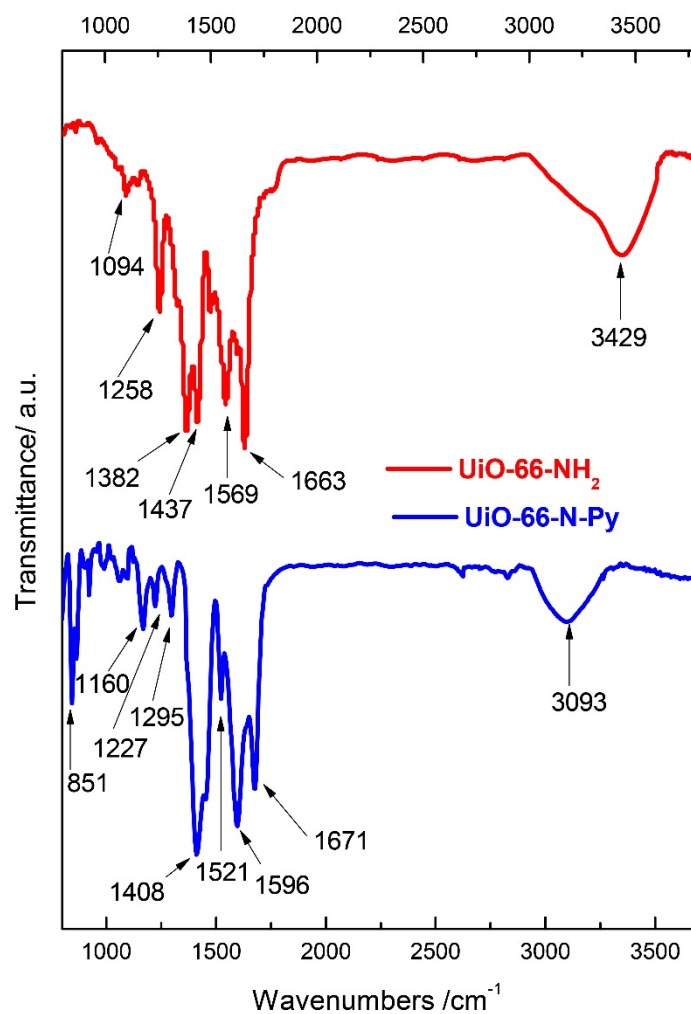

Figure S3. FTIR spectra of  $\text{UiO-66-N-Py}$  and  $\text{UiO-66-NH}_2$ .

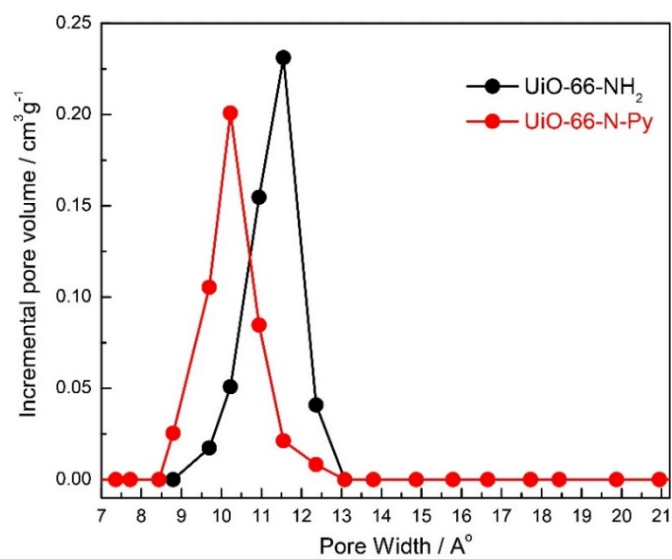

**Figure S4.** DFT adsorption pore-size distribution of UiO-66-N-Py and UiO-66-NH<sub>2</sub>.

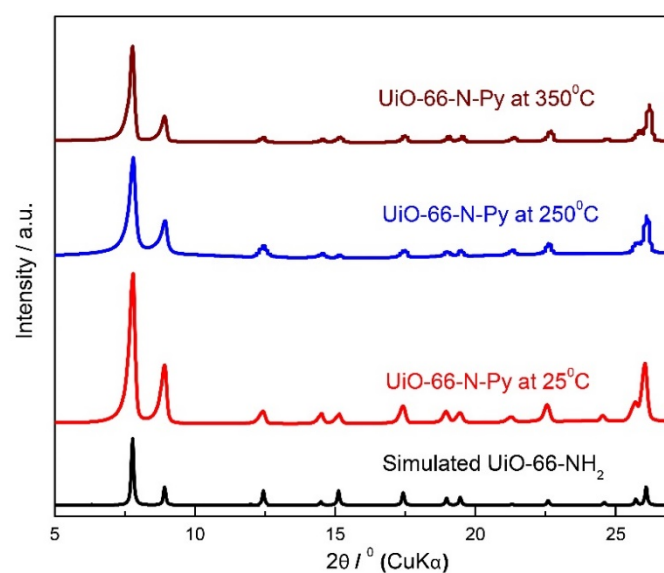

**Figure S5.** Thermal stability of UiO-66-N-Py at different temperatures.

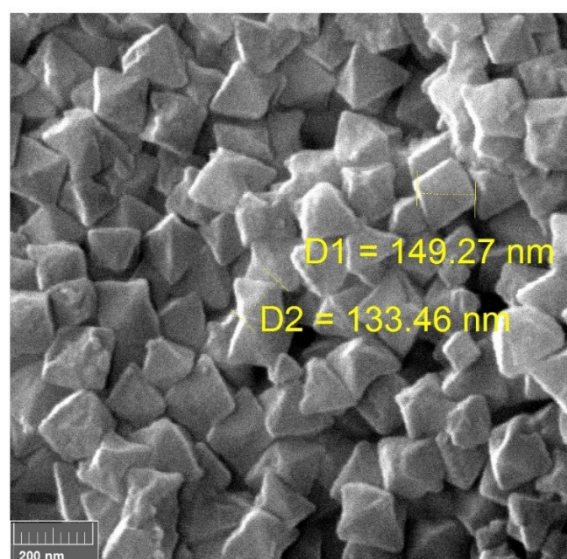

**Figure S6.** SEM image of UiO-66-N-Py.

### 3. Emission Properties of UiO-66-N-Py

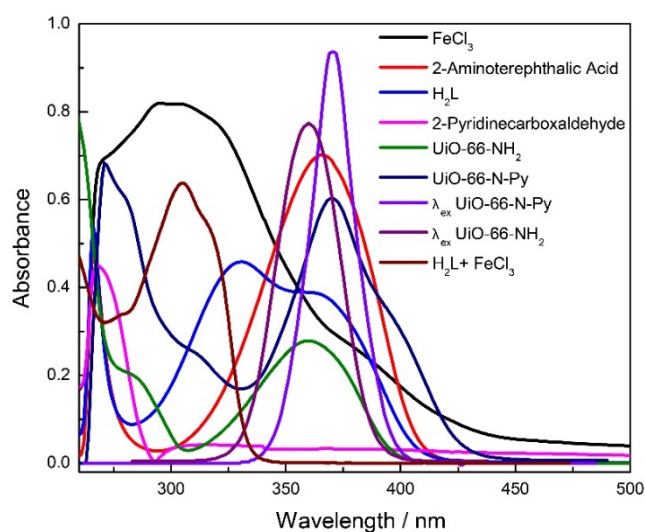

**Figure S7.** UV-vis spectra of UiO-66-N-Py, UiO-66-NH<sub>2</sub> linkers, and FeCl<sub>3</sub> in water.

The emission spectra were corrected for the inner filter effect by using the following correction factor:

$$F_{corr} = F_0 \times 10^{(A_{ex}l_{ex} + A_{em}l_{em})} \quad (1)$$

where  $F_{corr}$  is the corrected fluorescence intensity,  $A_{ex}$  is the absorbance at the excitation wavelength,  $l_{ex}$  is the penetration depth of the light into the sample,  $A_{em}$  is the absorbance over the emission wavelength and  $l_{em}$  is the emission path length [1].

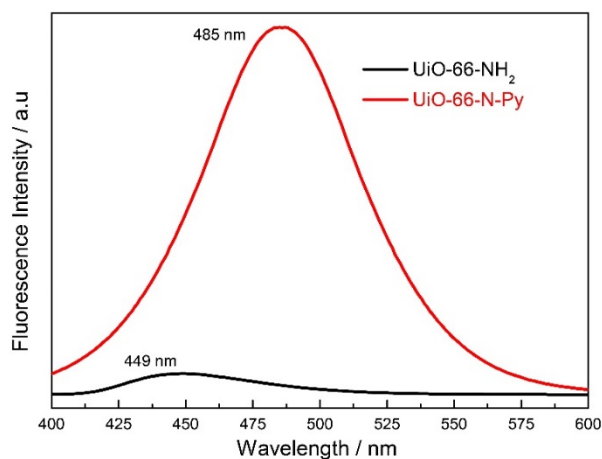

**Figure S8.** The fluorescence emission spectra of UiO-66-NH<sub>2</sub> and UiO-66-N-Py. ( $\lambda_{ex} = 341\text{nm}$ ).

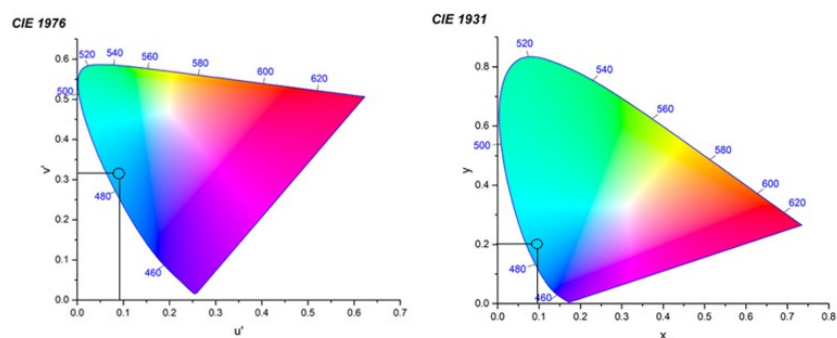

**Figure S9.** Chromaticity diagram of UiO-66-N-Py dispersion in water.

#### 4. Cation Sensing Properties of UiO-66-N-Py

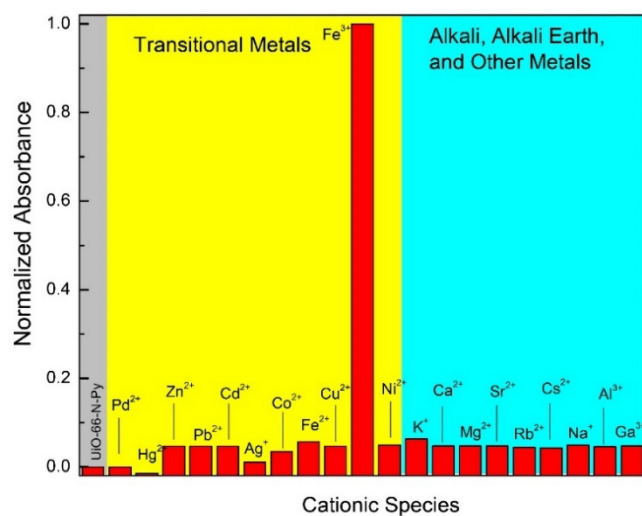

**Figure S10.** Change in the normalized absorbance of UiO-66-N-Py at 315 in water upon addition of 200 µL of different metal cations (10<sup>-2</sup> M).

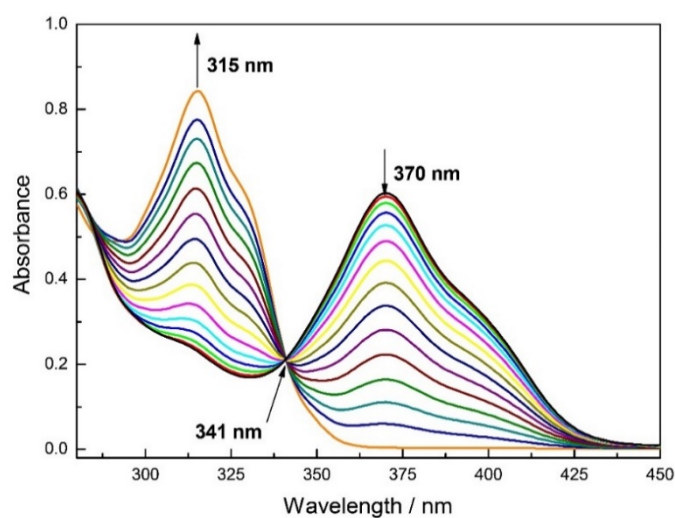

**Figure S11.** Changes in UV-vis spectra of UiO-66-N-Py with the incremental addition of FeCl<sub>3</sub> (10<sup>-2</sup> M) in water.

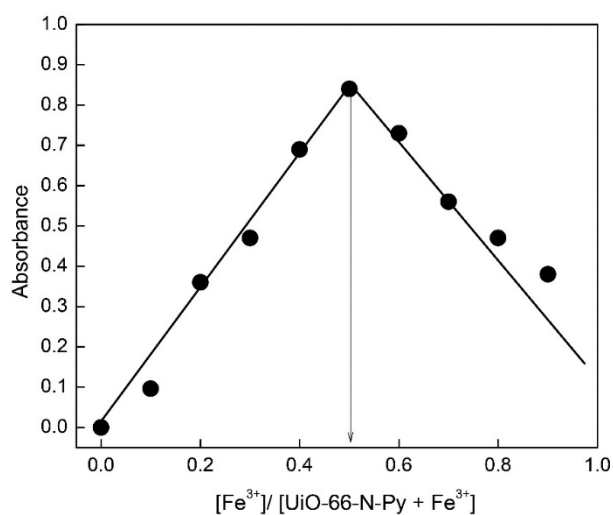

**Figure S12.** Job's plot for UiO-66-N-Py with FeCl<sub>3</sub> in water.

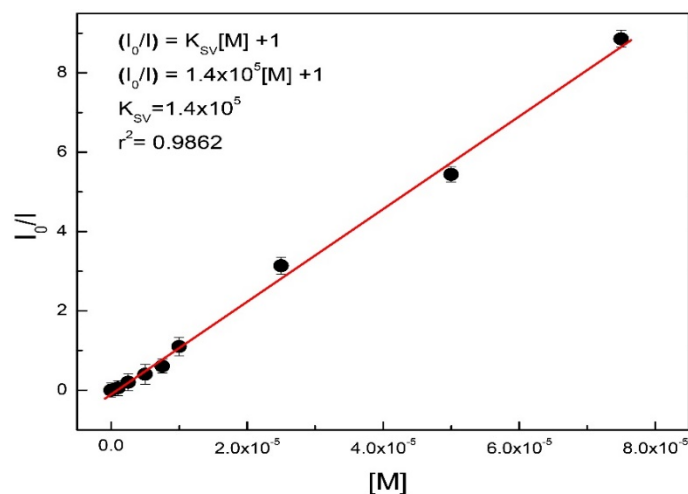

**Figure S13.** Stern-Volmer plot of UiO-66-N-Py quenched by FeCl<sub>3</sub> in water.

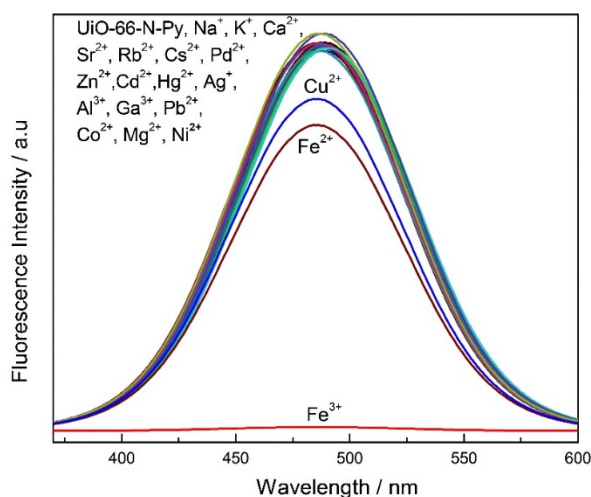

**Figure S14.** Changes in emission spectra of UiO-66-N-Py upon addition of 200  $\mu$ L of different metal cations ( $10^{-2}$  M) in water. ( $\lambda_{ex} = 341$  nm).

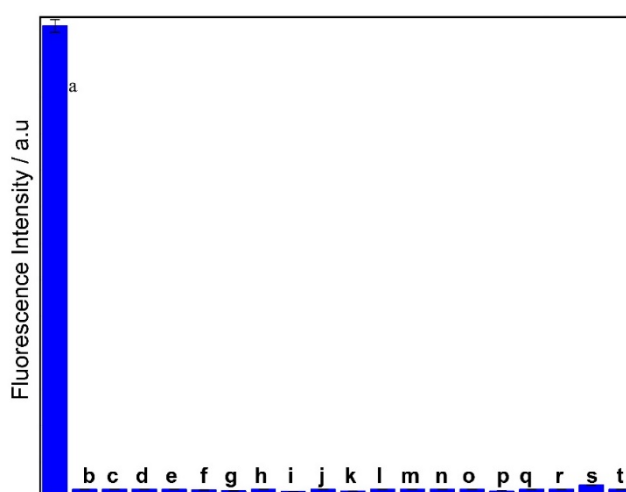

**Figure S15.** Competitive metal ion selectivity of UiO-66-N-Py: Bars indicate the fluorescence intensity (341 nm excitation, 485 nm emission). Salts of various metal ions ( $10^{-2}$  M) were added to UiO-66-N-Py and Fe<sup>3+</sup> ( $10^{-2}$  M) (a) UiO-66-N-Py only, (b) Ag<sup>+</sup> + Fe<sup>3+</sup>, (c) Pb<sup>2+</sup> + Fe<sup>3+</sup>, (d) Zn<sup>2+</sup> + Fe<sup>3+</sup>, (e) Mg<sup>2+</sup> + Fe<sup>3+</sup>, (f) Fe<sup>3+</sup> + Cu<sup>2+</sup>, (g) K<sup>+</sup> + Fe<sup>3+</sup>, (h) Co<sup>2+</sup> + Fe<sup>3+</sup>, (i) Al<sup>3+</sup> + Fe<sup>3+</sup>, (j) Fe<sup>2+</sup> + Fe<sup>3+</sup>, (k) Na<sup>+</sup> + Fe<sup>3+</sup>, (l) Cd<sup>2+</sup> + Fe<sup>3+</sup>, (m) Sr<sup>2+</sup> + Fe<sup>3+</sup>, (n) Rb<sup>+</sup> + Fe<sup>3+</sup>, (o) Pd<sup>2+</sup> + Fe<sup>3+</sup> (p) Ni<sup>2+</sup> + Fe<sup>3+</sup>, (q) Hg<sup>2+</sup> + Fe<sup>3+</sup>, (r) Ga<sup>3+</sup> + Fe<sup>3+</sup>, (s) Cs<sup>+</sup> + Fe<sup>3+</sup>, (t) Ca<sup>2+</sup> + Fe<sup>3+</sup> in water.

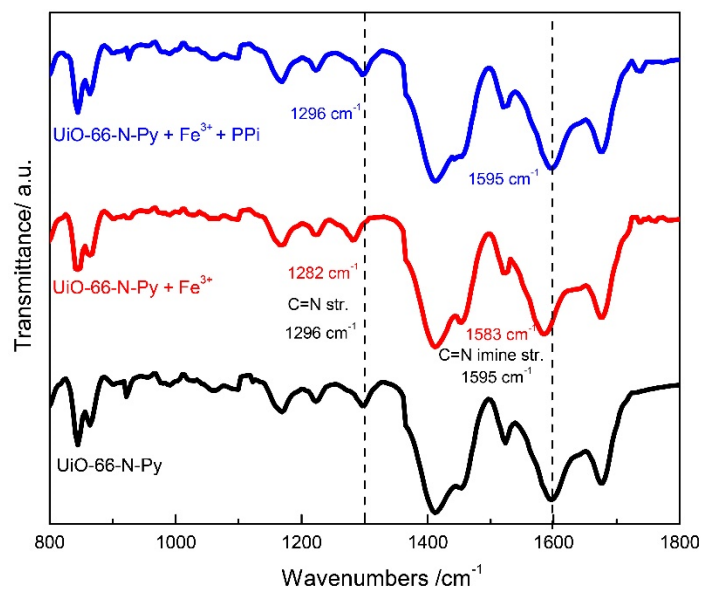

**Figure S16.** Part of FTIR spectra for UiO-66-N-Py before and after sensing experiments with  $\text{Fe}^{3+}$ .

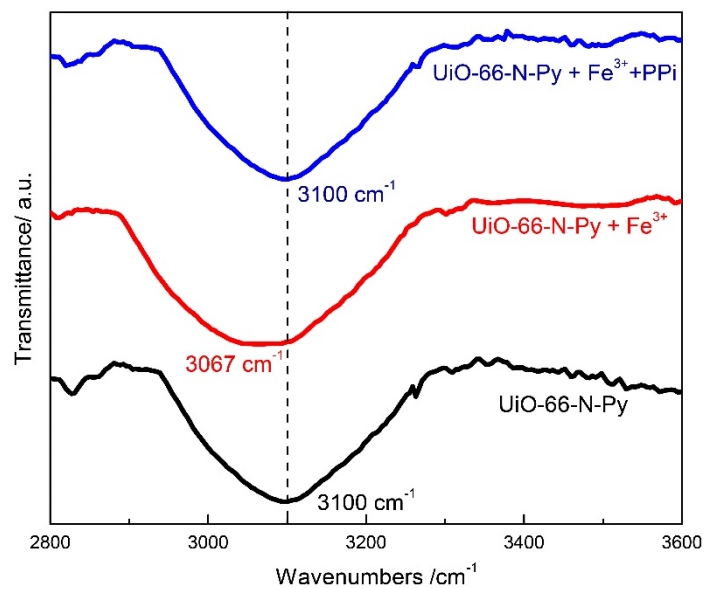

**Figure S17.** Part of FTIR spectra for UiO-66-N-Py before and after sensing experiments with  $\text{Fe}^{3+}$  and PPI.



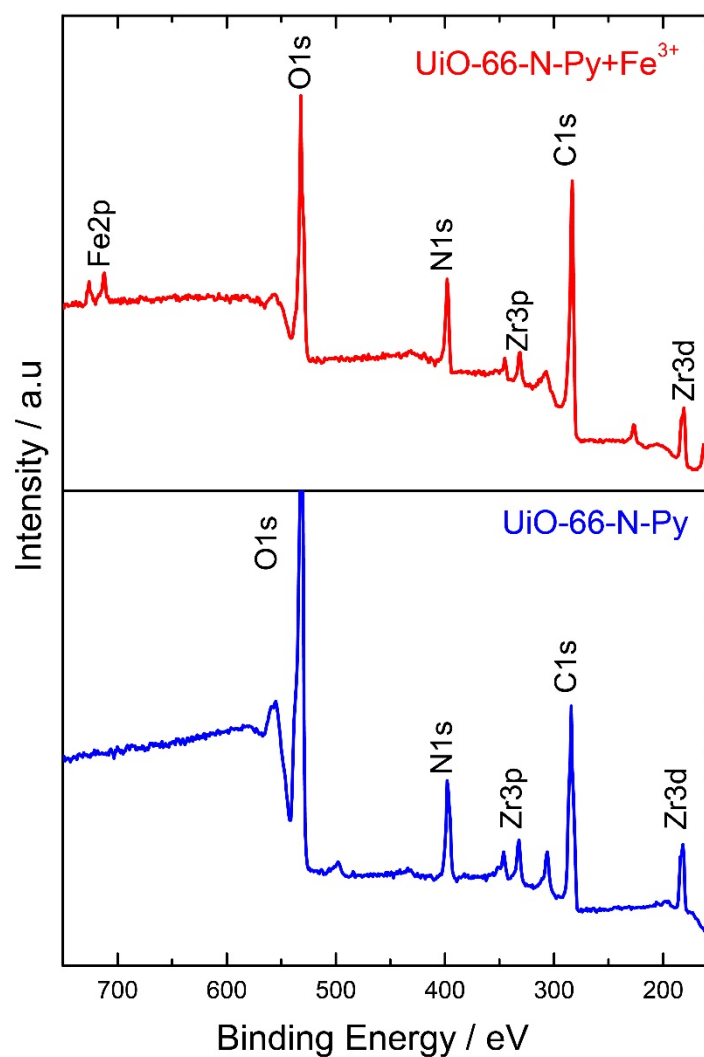

Figure S18. XPS of UiO-66-N-Py and UiO-66-N-Py+Fe<sup>3+</sup>.

### 5. Anion Sensing Properties of UiO-66-N-Py+Fe<sup>3+</sup>

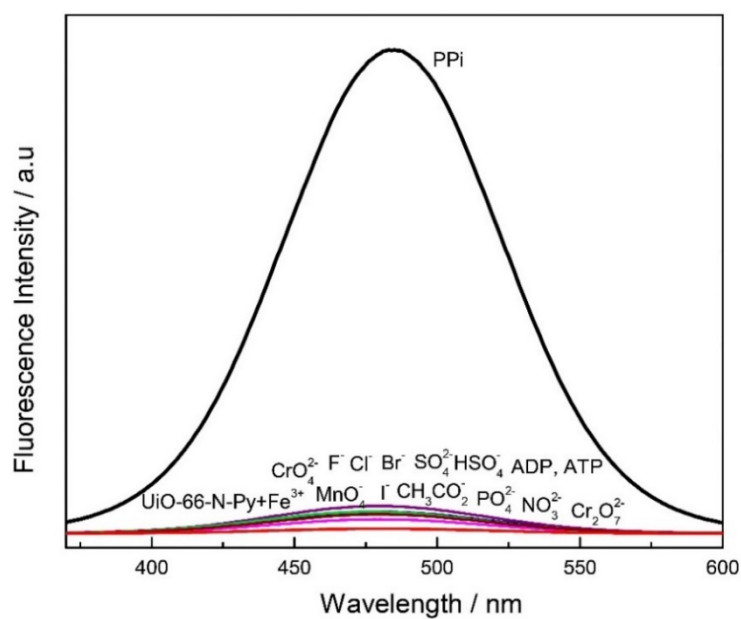

Figure S19. Changes in emission spectra of UiO-66-N-Py-Fe<sup>3+</sup> upon addition of 200  $\mu$ L of different anionic species ( $10^{-2}$  M) in water. ( $\lambda_{\text{ex}} = 341$  nm).



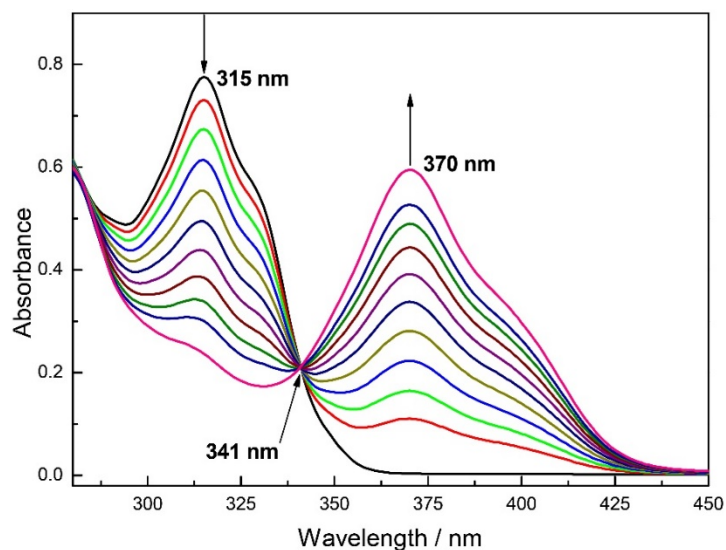

**Figure S20.** Changes in UV-vis spectra of UiO-66-N-Py+Fe<sup>3+</sup> with the incremental addition of PPI (10<sup>-2</sup> M) in water.

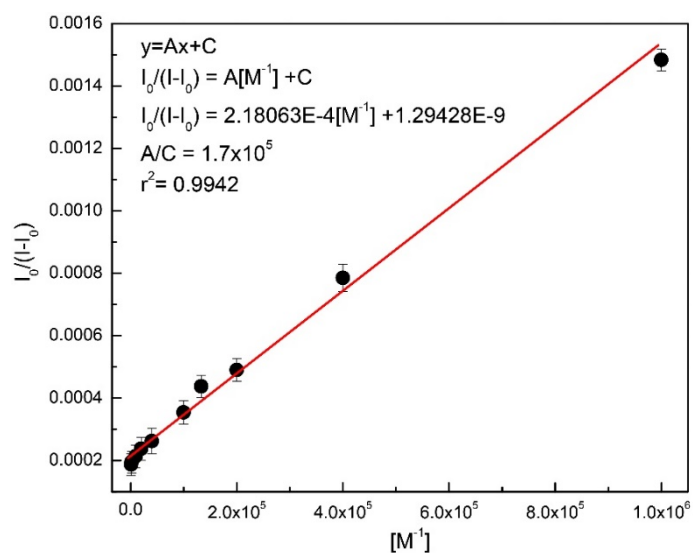

**Figure S21.** Binding constant calculation of UiO-66-N-Py+Fe<sup>3+</sup> with PPI in water.

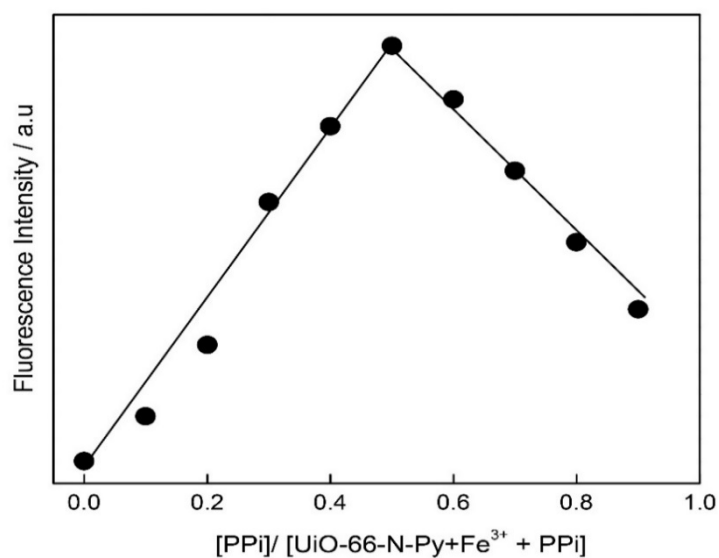

**Figure S22.** Job's plot for UiO-66-N-Py + Fe<sup>3+</sup> with PPI in water.

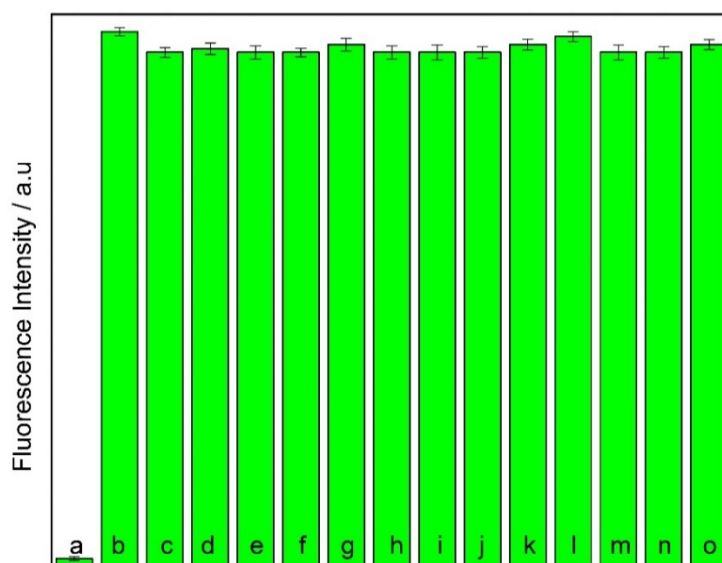

**Figure S23.** Competitive anion selectivity of UiO-66-N-Py+Fe<sup>3+</sup>: Bars indicate the fluorescence intensity (341 nm excitation, 485 nm emission). Various anions (10<sup>-2</sup> M) were added to UiO-66-N-Py+Fe<sup>3+</sup> and PPI (10<sup>-2</sup> M) (a) UiO-66-N-Py+Fe<sup>3+</sup> only, (b) F<sup>-</sup> + PPI, (c) Cl<sup>-</sup> + PPI, (d) Br<sup>-</sup> + PPI, (e) I<sup>-</sup> + PPI, (f) CH<sub>3</sub>CO<sub>2</sub><sup>-</sup> + PPI, (g) MnO<sub>4</sub><sup>-</sup> + PPI, (h) NO<sub>3</sub><sup>2-</sup> + PPI, (i) PO<sub>4</sub><sup>2-</sup> + PPI, (j) SO<sub>4</sub><sup>2-</sup> + PPI, (k) HSO<sub>4</sub><sup>-</sup> + PPI, (l) Cr<sub>2</sub>O<sub>7</sub><sup>2-</sup> + PPI, (m) CrO<sub>4</sub><sup>2-</sup> + PPI, (n) ADP + PPI, (o) ATP + PPI in water.

## 6. Determination of the detection limit [2]

The detection limit was calculated based on the fluorescence quenching titration experiments. The fluorescence emission spectrum of UiO-66-N-Py and UiO-66-N-Py+Fe<sup>3+</sup> was measured six times from which the standard deviation of the blank measurement was achieved. To gain the slope, the fluorescence intensity at 485 nm was plotted as a concentration of the analytes. So the detection limit was calculated with the following equation:

$$\text{Detection limit} = 3\sigma/k \quad (2)$$

where  $\sigma$  is the standard deviation of blank measurement,  $k$  is the slope between the normalized fluorescence intensity versus analytes concentrations.

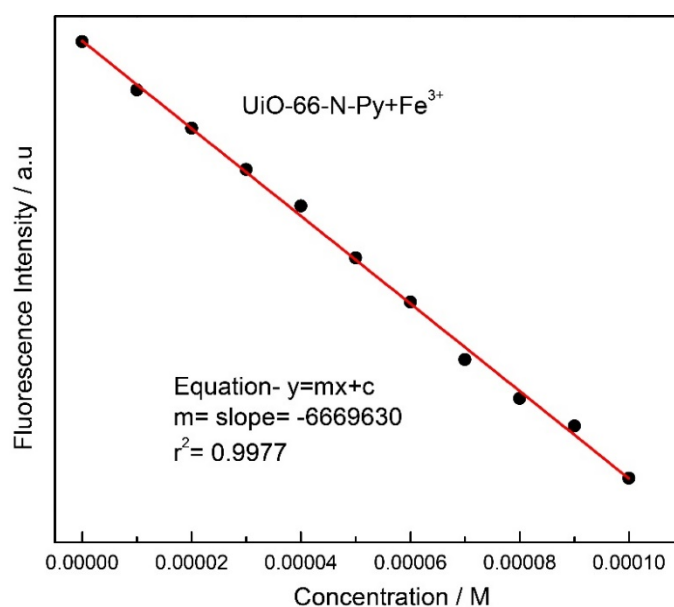

**Figure S24.** Linear region of fluorescence intensity ( $\lambda_{\text{ex}} = 341$  nm and  $\lambda_{\text{em}} = 485$  nm) for UiO-66-N-Py suspensions in water upon incremental addition of Fe<sup>3+</sup> solutions.

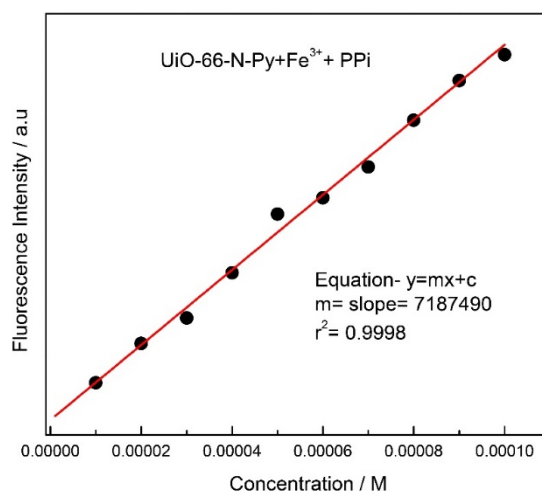

**Figure 25.** Linear region of fluorescence intensity ( $\lambda_{\text{ex}} = 341$  nm and  $\lambda_{\text{em}} = 485$  nm) for UiO-66-N-Py+Fe<sup>3+</sup> suspensions in water upon incremental addition of PPI solutions.

**Table 1.** Calculation of the Limit of Detection (LOD).

|   | Blank Readings                  | Fe <sup>3+</sup>                         | PPI                                     |
|---|---------------------------------|------------------------------------------|-----------------------------------------|
| 1 | Fluorescence Intensity          | 1027.495                                 | 19.23888                                |
| 2 | Fluorescence Intensity          | 1027.305                                 | 19.74356                                |
| 3 | Fluorescence Intensity          | 1027.525                                 | 19.94235                                |
| 4 | Fluorescence Intensity          | 1028.195                                 | 20.3923                                 |
| 5 | Fluorescence Intensity          | 1028.295                                 | 20.7681                                 |
| 6 | Fluorescence Intensity          | 1028.095                                 | 20.9871                                 |
|   | Standard Deviation ( $\sigma$ ) | 0.42415                                  | 0.72594                                 |
|   | Slope (k)                       | $6669630 \pm 254861 \mu\text{M}$         | $7187490 \pm 364513 \mu\text{M}$        |
|   | Detection limit ( $3\sigma/k$ ) | $0.19 \mu\text{M} /$<br>$10 \text{ ppb}$ | $0.3 \mu\text{M} /$<br>$50 \text{ ppb}$ |

## 7. pH Properties of UiO-66-N-Py

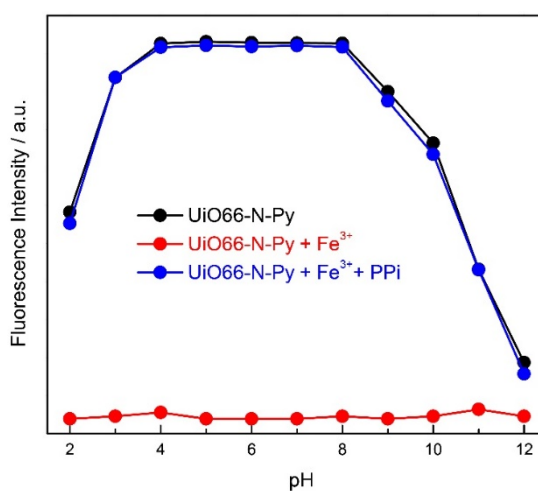

**Figure S26.** Effect of pH on the emission intensities at 485 nm of UiO-66-N-Py, in H<sub>2</sub>O ( $\lambda_{\text{ex}} = 341$  nm).

## References:

1. Sunish, K.S.; Benjamin, R.; Ryan, P.S.; Jędrzej, S.; Kenneth, P.G.; Matthew F.P.; Ronald P.S. Photophysics of Untethered ZnTPP Fullerene Complexes in Solution. *J. Phys. Chem. A* **2011**, *115*, 12217–12227.
2. Lv, R.; Wang, J.; Zhang, Y.; Li, H.; Yang, L.; Liao, S.; Gu, W.; Liu, X. An amino-decorated dual-functional metal–organic framework for highly selective sensing of Cr(III) and Cr(VI) ions and detection of nitroaromatic explosives. *J. Mater. Chem. A* **2016**, *4*, 15494–15500.
